# Supplementary material for: Tuning of MgO's base characteristics by blending it with amphoteric ZnO facilitating the selective glucose isomerization to fructose for bioenergy development
Source: Royal Society of Chemistry journal article supplement (doi:10.1039/d3na00097d), 2023-01-01
Supplement: d3na00097d1.pdf [file d3na00097d1.pdf]

## Supporting Information

### **Tuning of MgO's base characteristics by blending with amphoteric ZnO facilitates the selective glucose isomerization to fructose for bioenergy development**

Sangeeta Mahala,<sup>1,2</sup> Senthil M. Arumugam,<sup>1</sup> Sandeep Kumar,<sup>1</sup> Bhawana Devi,<sup>1,2</sup> and Sasikumar Elumalai<sup>1,\*</sup>

<sup>1</sup> *Chemical Engineering Division, DBT-Center of Innovative and Applied Bioprocessing, Mohali, Punjab 140306 India*

<sup>2</sup> *Department of Chemical Sciences, Indian Institute of Science Education and Research (IISER), Mohali, Punjab 140306 India*

\*Corresponding author information: [sasikumar@ciab.res.in](mailto:sasikumar@ciab.res.in) (S. Elumalai)

Tel: +91-172-5221-444

Total pages: 16

Total tables: 10

Total figures: 13

## Mathematical expressions

$$\text{Sugar conversion (wt. \%)} = \frac{(\text{Initial wt. of sugar} - \text{Remaining wt. of sugar after completion of reaction})}{\text{Initial wt. of Sugar}} \times 100$$

----- (S1)

$$\text{Product yield (wt. \%)} = \frac{\text{Wt. of product formation}}{\text{Initial wt. of sugar (reactant)}} \times 100$$

----- (S2)

$$\text{Product selectivity (wt. \%)} = \frac{\text{Wt. of product formation}}{\text{Converted wt. of reactant}} \times 100$$

----- (S3)

## Crystal structure parameter calculations using the XRD data:

### *Lattice strain ( $\epsilon$ ) of the crystal plane:*

$$\epsilon = \frac{\beta}{4 \tan(\theta)}$$

----- (S4)

Where,  $\beta$  is the full width at half maximum height (FWHM) of the sharp peaks and  $\theta$  is the measured angle. [1]

### *Lattice stress ( $\sigma$ ) in the lattice plane:*

$$\sigma = -4.5 \times 10^{11} \left( \frac{C - C_0}{C_0} \right) \text{ N/m}^2$$

----- (S5)

Where, C is the lattice parameter and  $C_0$  is the bulk value ( $\text{\AA}$ ). [1]

### *Dislocation density ( $\delta$ ):*

$$\delta = \frac{1}{D^2}$$

----- (S6)

Where, D is the crystalline size.<sup>[1]</sup>

**Reaction kinetics**

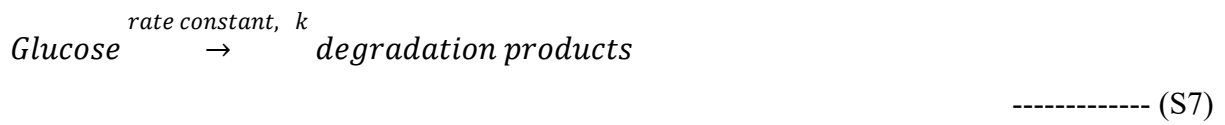

**Kinetic equation of the first-order reaction**

$$\ln \left\{ \frac{[\text{Glu}]_t}{[\text{Glu}]_0} \right\} = -k_{obs} \times \text{time (sec)} \quad \text{----- (S8)}$$

Where,  $[\text{Glu}]_t$  and  $[\text{Glu}]_0$  represent the final and initial glucose concentration at time  $t$ .  $k_{obs}$  is the observed rate constant of reaction (disappearance of glucose).

**Table S1.** XRD data of pristine ZnO and its composites of the (100) plane.

| <b>Parameters</b>              | <b>ZnO</b> | <b>ZM21</b> | <b>ZM11</b> | <b>ZM12</b> |
|--------------------------------|------------|-------------|-------------|-------------|
| $2\theta$ angle (100) (degree) | 31.31      | 31.56       | 31.81       | 31.84       |
| $d$ -spacing                   | 2.85       | 2.83        | 2.81        | 2.80        |
| $\beta$ -value                 | 0.1743     | 0.1782      | 0.2775      | 0.2755      |
| Crystalline size (nm)          | 49.44      | 48.39       | 31.09       | 30.86       |

**Table S2.** XRD data of pristine ZnO and its composites of the (002) plane.

| <b>Parameters</b>              | <b>ZnO</b> | <b>ZM21</b> | <b>ZM11</b> | <b>ZM12</b> |
|--------------------------------|------------|-------------|-------------|-------------|
| $2\theta$ angle (002) (degree) | 33.97      | 34.23       | 34.50       | 34.57       |
| $d$ -spacing                   | 2.63       | 2.61        | 2.59        | 2.59        |
| $\beta$ -value                 | 0.1750     | 0.1887      | 0.2656      | 0.2606      |
| Crystalline size (nm)          | 49.56      | 46.07       | 32.71       | 33.35       |

**Table S3.** XRD data of ZnO and its composites of the (101) plane.

| <b>Parameters</b>              | <b>ZnO</b> | <b>ZM21</b> | <b>ZM11</b> | <b>ZM12</b> |
|--------------------------------|------------|-------------|-------------|-------------|
| $2\theta$ angle (101) (degree) | 35.80      | 36.05       | 36.32       | 36.34       |
| $d$ -spacing                   | 2.50       | 2.48        | 2.47        | 2.46        |
| $\beta$ -value                 | 0.1787     | 0.1882      | 0.2697      | 0.2607      |
| Crystalline size (nm)          | 48.78      | 46.37       | 32.37       | 33.49       |

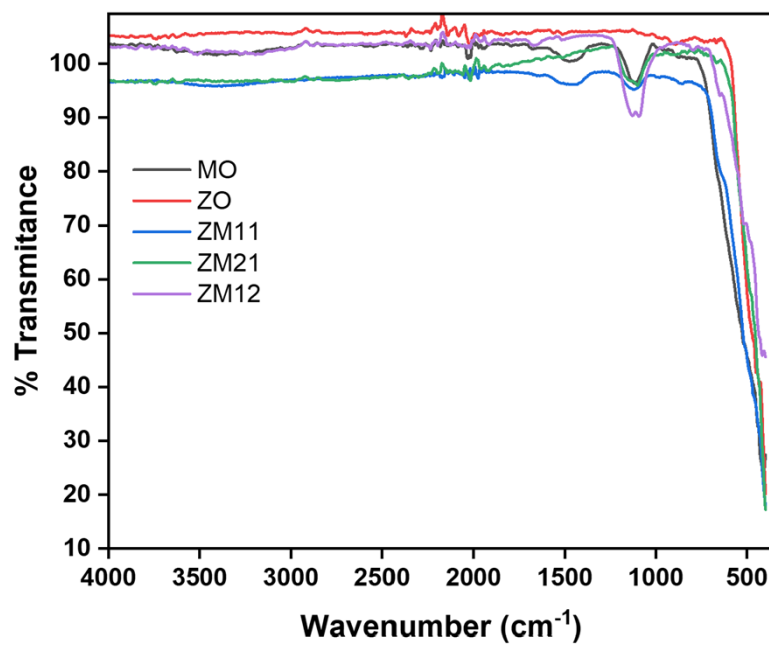

**Figure S1.** Comparative full-range FTIR spectra of as-synthesized catalysts.

**Table S4.** XPS analysis data (binding energy) of all synthesized catalysts.

| Catalysts | Reference (C 1s) | Zinc (2p)         |                   | Magnesium (1s) | Oxygen (1s)     |
|-----------|------------------|-------------------|-------------------|----------------|-----------------|
|           |                  | 2p <sub>3/2</sub> | 2p <sub>1/2</sub> |                |                 |
| MgO       | 292.84           | n.a               | n.a               | 1312.51        | 539.08          |
| ZnO       | 285.90           | 1022.28           | 1045.37           | n.a            | 530.99 & 532.90 |
| ZM21      | 284.51           | 1021.44           | 1044.55           | 1304.29        | 530.18          |
| ZM11      | 285.08           | 1023.11           | 1045.97           | 1306.59        | 534.32          |
| ZM21      | 284.61           | 1021.67           | 1044.79           | 1304.58        | 530.01          |

Note: Binding energy values are given in eV unit.

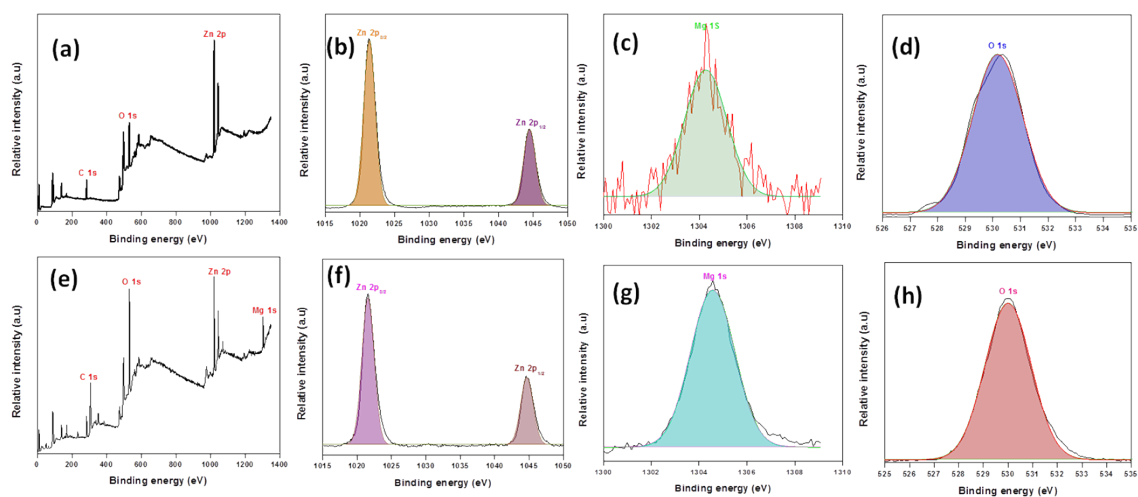

**Figure S2.** XPS characterization results of ZM21(a-d) and ZM12 (e-h).

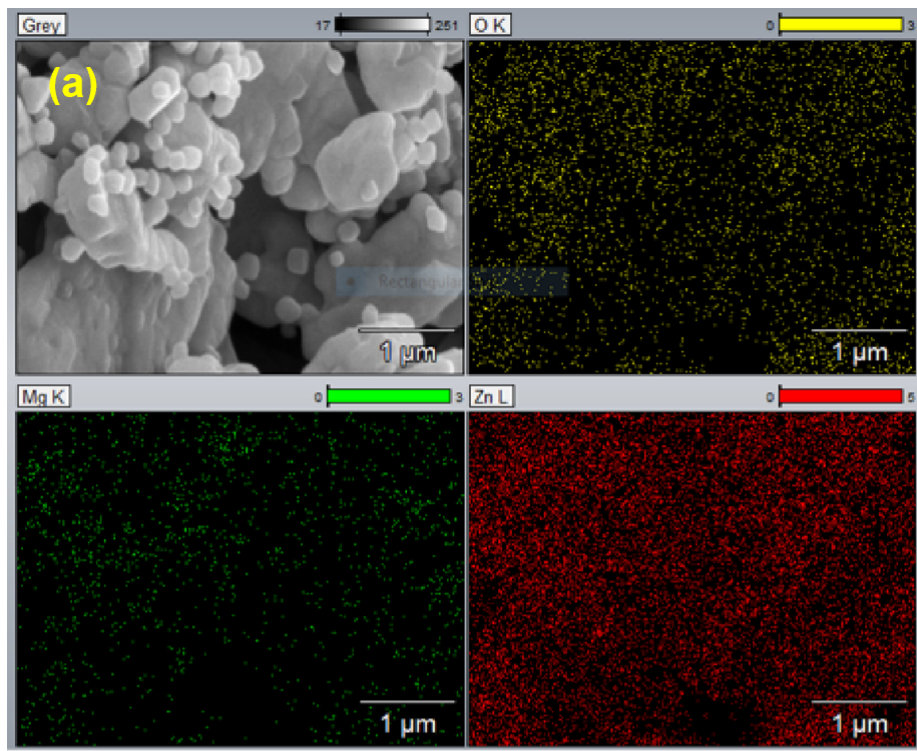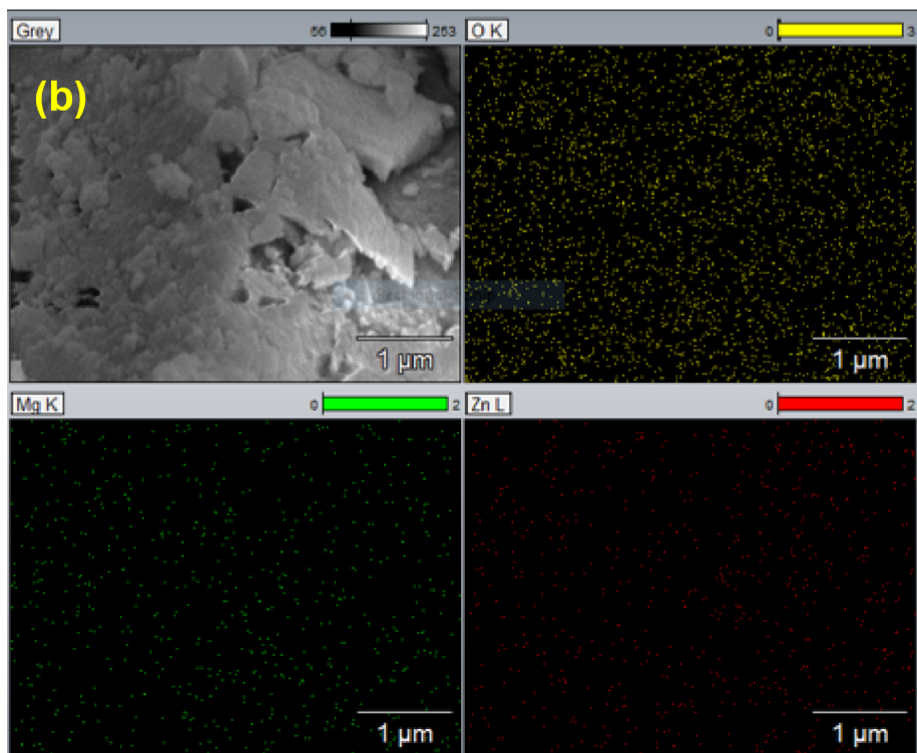

**Figure S3.** FE-SEM mapping result of ZM21 (a) and ZM12 (b)

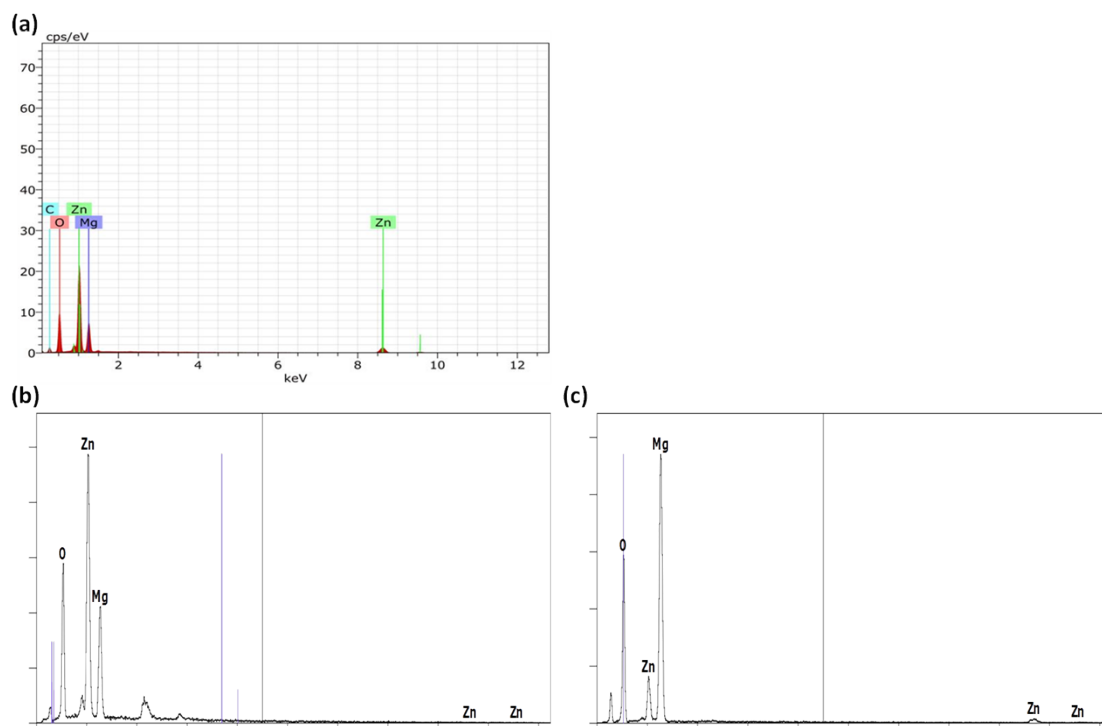

**Figure S4.** Result of FESEM EDX of ZM11(a), ZM21(b) and ZM12(c).

| Catalysts | Wt. ratio of Zn/Mg <sup>a</sup> | Mg (wt. %) <sup>b</sup> | Zn (wt. %) <sup>b</sup> | O (wt. %) <sup>b</sup> |
|-----------|---------------------------------|-------------------------|-------------------------|------------------------|
| MO        | 0.0/0.99                        | -                       | -                       | -                      |
| ZO        | 0.98/0.0                        | -                       | -                       | -                      |
| ZM11      | 0.49/0.5                        | 23.0                    | 22.0                    | 55.0                   |
| ZM21      | 0.67/0.32                       | 19.8                    | 59.7                    | 20.5                   |
| ZM12      | 0.33/0.66                       | 45.0                    | 14.1                    | 40.9                   |

**Table S5.** ICP-MS elemental composition and FESEM EDX analysis result of catalysts.



<sup>a</sup> ICP-MS; <sup>b</sup> FE-SEM-EDX

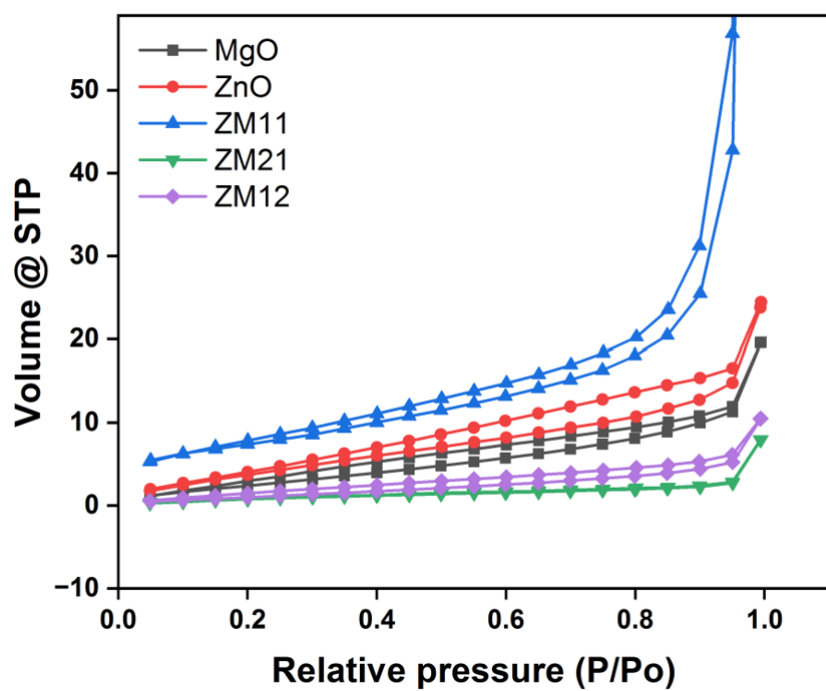

**Figure S5.** N<sub>2</sub> adsorption-desorption isotherm curve of the as-synthesized catalysts.

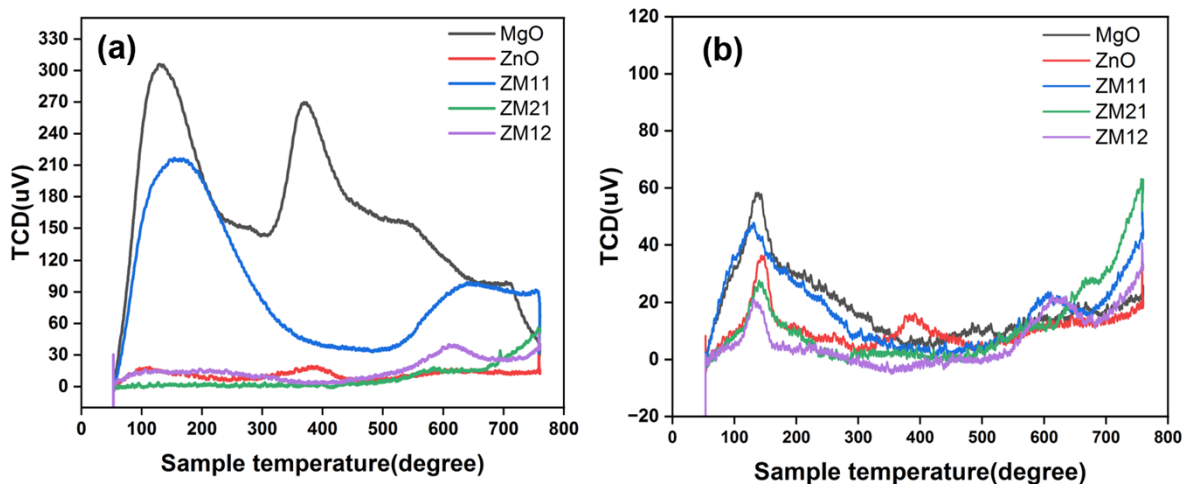

**Figure S6.** (a) CO<sub>2</sub>-TPD and (b) NH<sub>3</sub>-TPD response curves of the as-synthesized catalysts via chemisorption.

**Table S6.** Formed products of the glucose isomerization at 100 °C in water after 90 min at 12.5% catalyst load.

| Catalysts | Residual glucose (%) | Fructose yield (%) | Mannose yield (%) | Allulose yield (%) |
|-----------|----------------------|--------------------|-------------------|--------------------|
| MO        | 47.23                | 29.75              | 2.65              | 0.8                |
| ZO        | 97.16                | 1.92               | n.d.              | n.d.               |
| ZM11      | 62.22                | 31.29              | 2.49              | 1.21               |
| ZM21      | 94.22                | 3.13               | n.d               | 1.129              |
| ZM12      | 68.29                | 25.29              | 1.77              | 0.63               |

n.d- not detected.

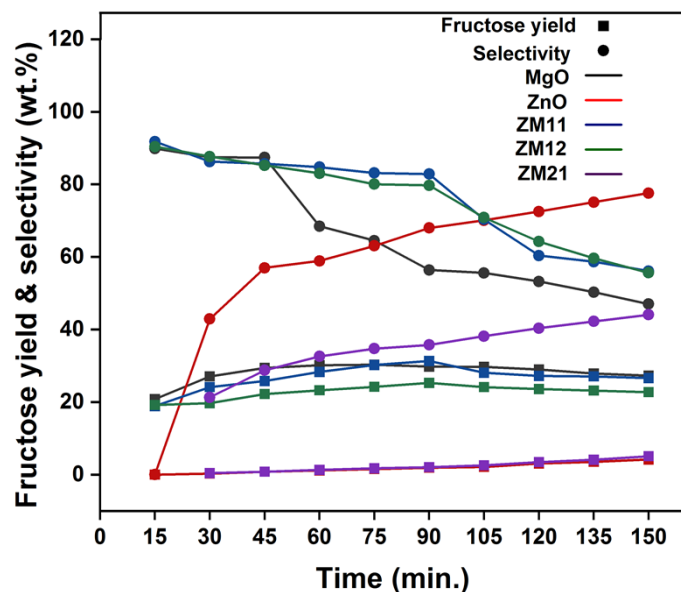

**Figure S7.** Glucose isomerization profile of different catalysts in water at 100 °C and 12.5% catalyst load on glucose up to 150 min.

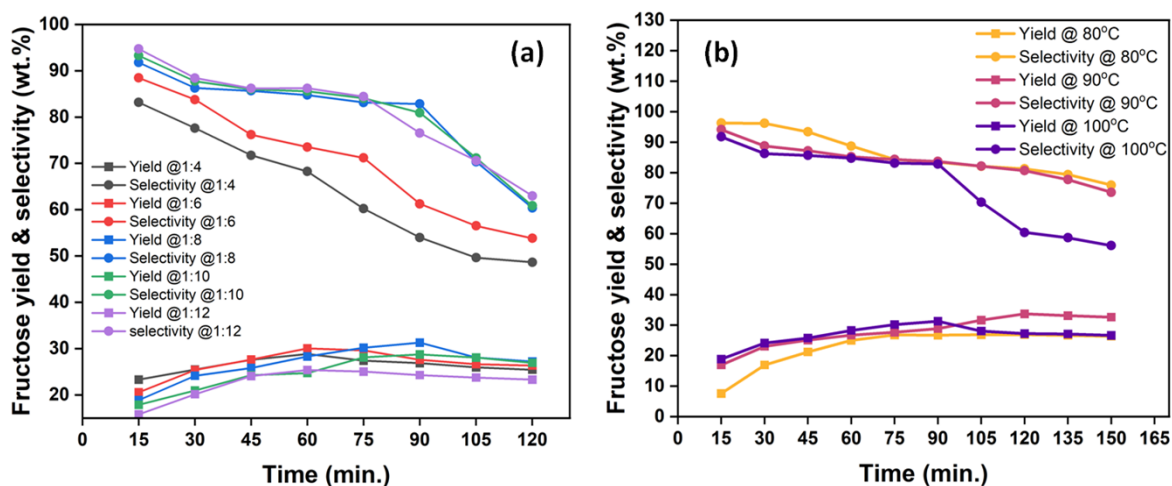

**Figure S8.** Glucose isomerization profile of ZM11 in water: (a) under different catalyst load conditions at 100 °C up to 120 min, and (b) under different temperature conditions at 12.5% (1:8) catalyst load up to 150 min.

**Table S7.** Carbon balance result of glucose isomerization to fructose over ZnO/MgO under different operating conditions.

| Different catalyst (100 °C in water for 90 min, catalyst:substrate-1:8) | Carbon balance | Different catalyst loading (100 °C for 90 min in water) | Carbon balance | Different Temp. (120 min, catalyst:substrate-1:8) | Carbon balance |
|-------------------------------------------------------------------------|----------------|---------------------------------------------------------|----------------|---------------------------------------------------|----------------|
| MgO                                                                     | 63.02          | 1:4                                                     | 64.18          | 100                                               | 70.13          |
| ZnO                                                                     | 67.97          | 1:6                                                     | 70.48          | 90                                                | 90.75          |
| ZM11                                                                    | 93.14          | 1:8                                                     | 92.65          | 80                                                | 91.63          |
| ZM21                                                                    | 73.86          | 1:10                                                    | 90.28          | -                                                 | -              |
| ZM12                                                                    | 87.20          | 1:12                                                    | 83.48          | -                                                 | -              |

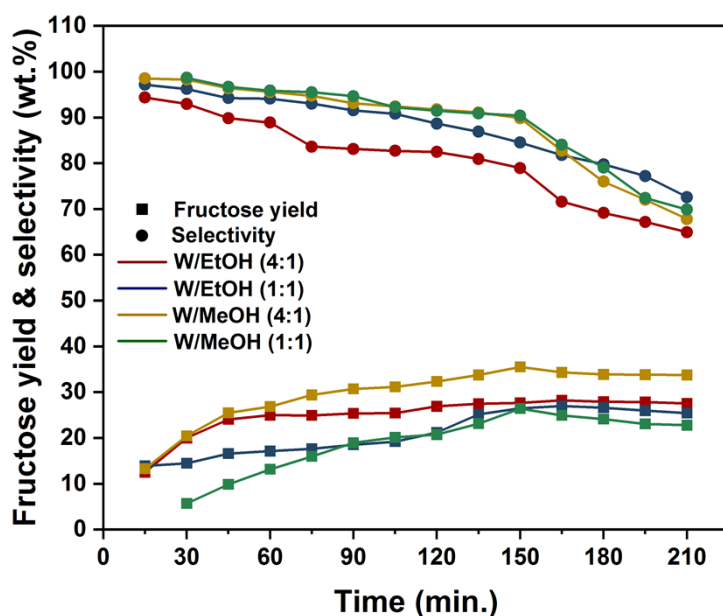

**Figure S9.** Glucose isomerization profile of ZM11 in different reaction mediums (water/alcohol) at 90 °C and 12.5% catalyst load on glucose up to 210 min.

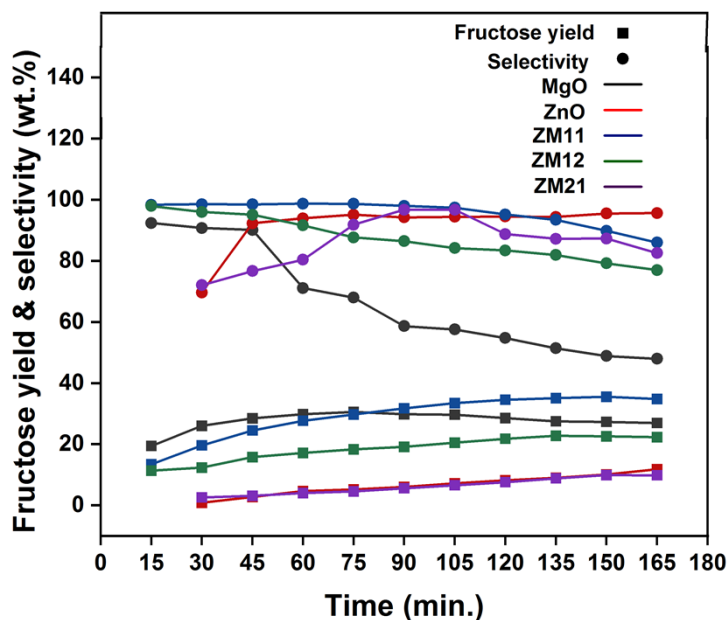

**Figure S10.** Glucose isomerization profile of different catalysts in 4:1 vol. W/MeOH medium at 90 °C and 12.5% catalyst load on glucose up to 165 min.

**Table S8.** Carbon balance result of glucose isomerization to fructose over ZnO/MgO in different solvent medium.

| Different solvent (at 90 °C, 150 min, catalyst:substrate-1:8) | Carbon balance | Different catalyst in W/MeOH (4:1) at 90 °C for 150 min | Carbon balance |
|---------------------------------------------------------------|----------------|---------------------------------------------------------|----------------|
| Water                                                         | 54.70          | MgO                                                     | 61.94          |
| W/EtOH (4:1)                                                  | 86.00          | ZnO                                                     | 95.40          |
| W/MeOH (4:1)                                                  | 95.92          | ZM11                                                    | 95.92          |
| -                                                             | -              | ZM21                                                    | 84.05          |
| -                                                             | -              | ZM12                                                    | 87.29          |

**Table S9.** Formed products of the glucose isomerization at 90 °C in W/MeOH(4:1) after 150 min at 12.5% catalyst load.

| <b>Catalysts</b> | <b>Residual glucose (%)</b> | <b>Fructose yield (%)</b> | <b>Mannose yield (%)</b> | <b>Allulose yield (%)</b> |
|------------------|-----------------------------|---------------------------|--------------------------|---------------------------|
| MO               | 44.07                       | 27.335                    | 4.91                     | 2.41                      |
| ZO               | 89.4                        | 10.12                     | n.d.                     | n.d.                      |
| ZM11             | 60.48                       | 35.5                      | 0.81                     | n.d.                      |
| ZM21             | 88.71                       | 9.86                      | n.d.                     | n.d.                      |
| ZM12             | 71.53                       | 22.54                     | 0.45                     | 0.94                      |

n.d- not detected.

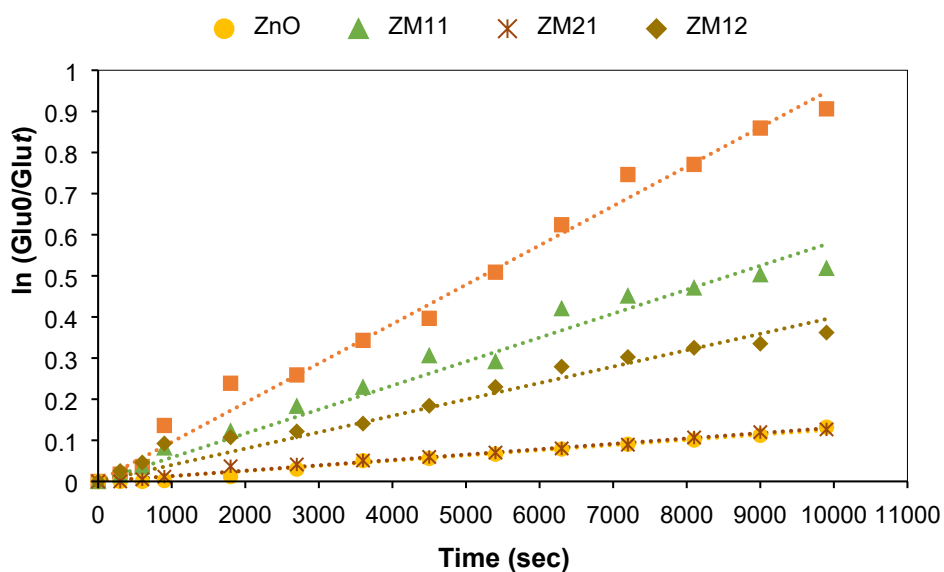

**Figure S11.** First-order kinetics of glucose isomerization over pristine and composite metal oxide catalysts in optimum solvent (W/MeOH) at 90 °C and 12.5% wt. catalyst load up to 165 min.

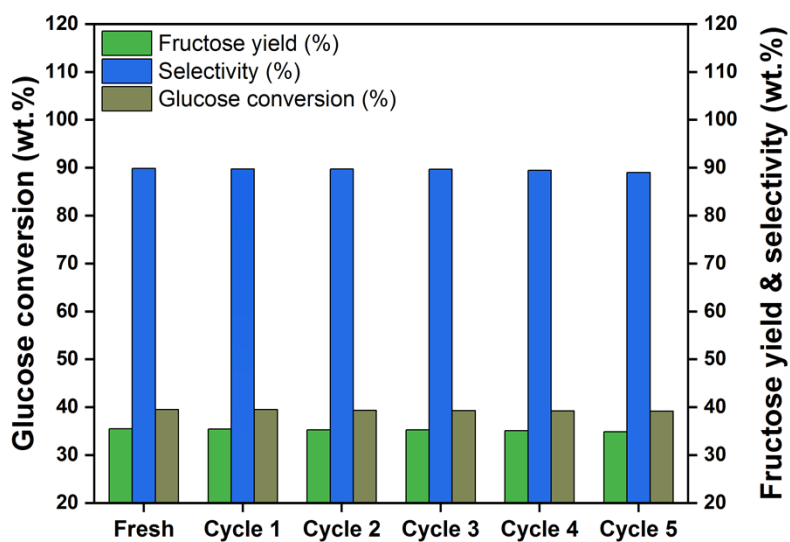

**Figure S12.** Recyclability result of ZM11 in W/MeOH(4:1)medium under optimum conditions.

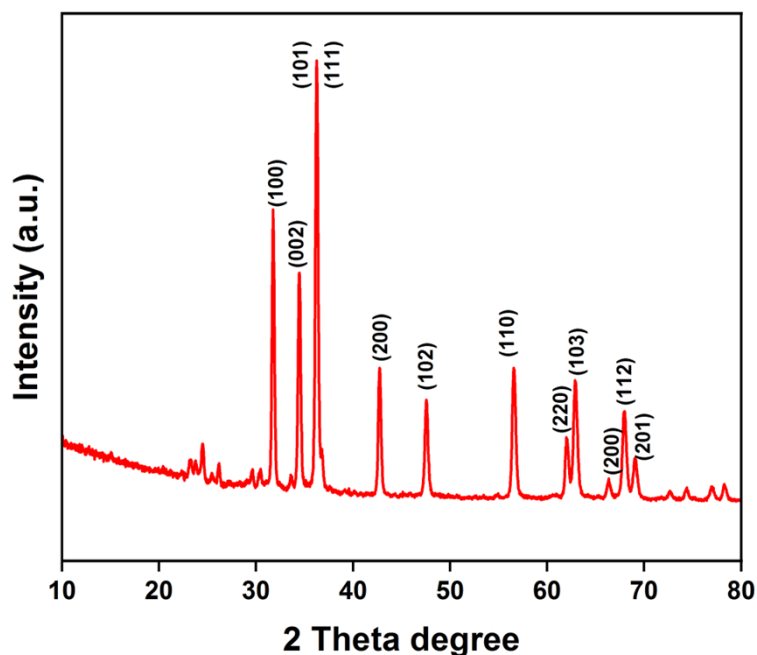

**Figure S13.** XRD characterization result of ZM11 after 5 cycles under optimum conditions.

**Table S10.** Green metrics calculation of the MZ11 catalyzed glucose isomerization in W/MeOH.

| Sl. No. | Green metrics*                  | Ideal value | Process: glucose isomerization over ZM11 |
|---------|---------------------------------|-------------|------------------------------------------|
| 1.      | Environmental factor (E-factor) | 0.0         | 1.67                                     |
| 2.      | Process mass intensity (MI)     | 1.0         | 2.67                                     |
| 3.      | Carbon efficiency (CE, %)       | 100.0       | 37.44                                    |
| 4.      | Atom economy (AE, %)            | 100.0       | 100.0                                    |

**\*Calculations:**

$$\text{Environmental (E) factor} = \frac{\text{Wt. total waste formed}}{\text{Wt. total product formed}}$$

$$\text{Process mass intensity (MI)} = \frac{\text{Mass of reactant supplied}}{\text{Mass of product(s) formed}}$$



$$\text{Carbon efficiency} = \frac{\text{Moles of carbon in product(s)}}{\text{Moles of carbon in reactant}} \times 100$$

$$\text{Atom economy} = \frac{\text{Mol.wt. of product(s)}}{\text{Total mol.wt. of reactant}} \times 100$$

**Reference:**

1. Abed, C., Ali, M. B., Addad, A., & Elhouichet, H. (2019). Growth, structural and optical properties of ZnO-ZnMgO-MgO nanocomposites and their photocatalytic activity under sunlight irradiation. *Materials Research Bulletin*, 110, 230-238.
